# Supplementary material for: The Accuracy of Diagnostic Tests for Lyme Disease in Humans, A Systematic Review and Meta-Analysis of North American Research
Source: PubMed Central journal article supplement (PMC5176185; doi:10.1371/journal.pone.0168613), 2016-12-21
Supplement: pone.0168613.s003.pdf [file pone.0168613.s003.pdf]

1 **S2: 48 Studies Included in the SR and a List of licensed tests for Lyme disease as of May 2015**

2 **48 Studies Included in the SR**

- 3 1. Avery RA, Frank G, Eppes SC. Diagnostic utility of *Borrelia burgdorferi* cerebrospinal fluid polymerase  
4 chain reaction in children with Lyme meningitis. *The Pediatric infectious disease journal* 2005; 24: 705-  
5 708; doi:00006454-200508000-00010 [pii].
- 6 2. Bacon RM, *et al.* Serodiagnosis of Lyme disease by kinetic enzyme-linked immunosorbent assay using  
7 recombinant VlsE1 or peptide antigens of *Borrelia burgdorferi* compared with 2-tiered testing using  
8 whole-cell lysates. *The Journal of infectious diseases* 2003; 187: 1187-1199; doi:JID20849 [pii].
- 9 3. Branda JA, *et al.* 2-tiered antibody testing for early and late Lyme disease using only an  
10 immunoglobulin G blot with the addition of a VlsE band as the second-tier test. *Clinical infectious*  
11 *diseases : an official publication of the Infectious Diseases Society of America* 2010; 50: 20-26;  
12 doi:10.1086/648674 [doi].
- 13 4. Branda JA, *et al.* Two-tiered antibody testing for Lyme disease with use of 2 enzyme immunoassays, a  
14 whole-cell sonicate enzyme immunoassay followed by a VlsE C6 peptide enzyme immunoassay. *Clinical*  
15 *infectious diseases : an official publication of the Infectious Diseases Society of America* 2011; 53: 541-  
16 547; doi:10.1093/cid/cir464 [doi].
- 17 5. Brissette CA, *et al.* The borrelial fibronectin-binding protein RevA is an early antigen of human Lyme  
18 disease. *Clinical and vaccine immunology : CVI* 2010; 17: 274-280; doi:10.1128/CVI.00437-09 [doi].
- 19 6. Brunner M, Sigal LH. Use of serum immune complexes in a new test that accurately confirms early  
20 Lyme disease and active infection with *Borrelia burgdorferi*. *Journal of clinical microbiology* 2001; 39:  
21 3213-3221.
- 22 7. Brunner M, *et al.* Immunoglobulin M capture assay for serologic confirmation of early Lyme disease:  
23 analysis of immune complexes with biotinylated *Borrelia burgdorferi* sonicate enhanced with flagellin  
24 peptide epitope. *Journal of clinical microbiology* 1998; 36: 1074-1080.
- 25 8. Burbelo PD, *et al.* Rapid, simple, quantitative, and highly sensitive antibody detection for lyme  
26 disease. *Clinical and vaccine immunology : CVI* 2010; 17: 904-909; doi:10.1128/CVI.00476-09 [doi].
- 27 9. Callister SM, *et al.* Ability of the borreliacidal antibody test to confirm lyme disease in clinical practice.  
28 *Clinical and diagnostic laboratory immunology* 2002; 9: 908-912.
- 29 10. Callister SM, *et al.* Sensitivity and specificity of the borreliacidal-antibody test during early Lyme  
30 disease: a "gold standard"? *Clinical and diagnostic laboratory immunology* 1996; 3: 399-402.
- 31 11. Embers ME, *et al.* *Borrelia burgdorferi* spirochetes that harbor only a portion of the lp28-1 plasmid  
32 elicit antibody responses detectable with the C6 test for Lyme disease. *Clinical and vaccine immunology :*  
33 *CVI* 2007; 14: 90-93; doi:CVI.00266-06 [pii].

- 34 12. Eshoo MW, *et al.* Direct molecular detection and genotyping of *Borrelia burgdorferi* from whole  
35 blood of patients with early Lyme disease. *PLoS one* 2012; 7: e36825; doi:10.1371/journal.pone.0036825  
36 [doi].
- 37 13. Fawcett PT, *et al.* Comparison of immunodot and western blot assays for diagnosing Lyme  
38 borreliosis. *Clinical and diagnostic laboratory immunology* 1998; 5: 503-506.
- 39 14. Gomes-Solecki MJ, *et al.* Recombinant chimeric *Borrelia* proteins for diagnosis of Lyme disease.  
40 *Journal of clinical microbiology* 2000; 38: 2530-2535.
- 41 15. Gomes-Solecki MJ, *et al.* Epitope length, genospecies dependency, and serum panel effect in the IR6  
42 enzyme-linked immunosorbent assay for detection of antibodies to *Borrelia burgdorferi*. *Clinical and*  
43 *vaccine immunology : CVI* 2007; 14: 875-879; doi:CVI.00122-07 [pii].
- 44 16. Gomes-Solecki MJ, *et al.* A first-tier rapid assay for the serodiagnosis of *Borrelia burgdorferi*  
45 infection. *Archives of Internal Medicine* 2001; 161: 2015-2020; doi:ioi00721 [pii].
- 46 17. Gomes-Solecki MJ, *et al.* Recombinant assay for serodiagnosis of Lyme disease regardless of OspA  
47 vaccination status. *Journal of clinical microbiology* 2002; 40: 193-197.
- 48 18. Hilton E, Devoti J, Sood S. Recommendation to include OspA and OspB in the new immunoblotting  
49 criteria for serodiagnosis of Lyme disease. *Journal of clinical microbiology* 1996; 34: 1353-1354.
- 50 19. Jobe DA, *et al.* Significantly improved accuracy of diagnosis of early Lyme disease by peptide  
51 enzyme-linked immunosorbent assay based on the borreliacidal antibody epitope of *Borrelia burgdorferi*  
52 OspC. *Clinical and vaccine immunology : CVI* 2008; 15: 981-985; doi:10.1128/VI.00079-08 [doi].
- 53 20. Johnson BJ, *et al.* Serodiagnosis of Lyme disease: accuracy of a two-step approach using a flagella-  
54 based ELISA and immunoblotting. *The Journal of infectious diseases* 1996; 174: 346-353.
- 55 21. Ledue TB, Collins MF, Craig WY. New laboratory guidelines for serologic diagnosis of Lyme disease:  
56 evaluation of the two-test protocol. *Journal of clinical microbiology* 1996; 34: 2343-2350.
- 57 22. Ledue TB, *et al.* Evaluation of the recombinant VlsE-based liaison chemiluminescence immunoassay  
58 for detection of *Borrelia burgdorferi* and diagnosis of Lyme disease. *Clinical and vaccine immunology :*  
59 *CVI* 2008; 15: 1796-1804; doi:10.1128/VI.00195-08 [doi].
- 60 23. Liang FT, *et al.* Sensitive and specific serodiagnosis of Lyme disease by enzyme-linked  
61 immunosorbent assay with a peptide based on an immunodominant conserved region of *Borrelia*  
62 *burgdorferi* vlsE. *Journal of clinical microbiology* 1999; 37: 3990-3996.
- 63 24. Liveris D, *et al.* Improving the yield of blood cultures from patients with early Lyme disease. *Journal*  
64 *of clinical microbiology* 2011; 49: 2166-2168; doi:10.1128/JCM.00350-11 [doi].
- 65 25. Liveris D, *et al.* Comparison of five diagnostic modalities for direct detection of *Borrelia burgdorferi*  
66 in patients with early Lyme disease. *Diagnostic microbiology and infectious disease* 2012; 73: 243-245;  
67 doi:10.1016/j.diagmicrobio.2012.03.026 [doi].

- 68 26. Liveris D, *et al.* Quantitative detection of *Borrelia burgdorferi* in 2-millimeter skin samples of  
69 erythema migrans lesions: correlation of results with clinical and laboratory findings. *Journal of clinical*  
70 *microbiology* 2002; 40: 1249-1253.
- 71 27. Magnarelli LA, *et al.* Use of recombinant antigens of *Borrelia burgdorferi* in serologic tests for  
72 diagnosis of Lyme borreliosis. *Journal of clinical microbiology* 1996; 34: 237-240.
- 73 28. Marques AR, *et al.* Detection of immune complexes is not independent of detection of antibodies in  
74 Lyme disease patients and does not confirm active infection with *Borrelia burgdorferi*. *Clinical and*  
75 *diagnostic laboratory immunology* 2005; 12: 1036-1040; doi:12/9/1036 [pii].
- 76 29. Mogilyansky E, *et al.* Comparison of Western immunoblotting and the C6 Lyme antibody test for  
77 laboratory detection of Lyme disease. *Clinical and diagnostic laboratory immunology* 2004; 11: 924-929;  
78 doi:10.1128/CDLI.11.5.924-929.2004 [doi].
- 79 30. Nocton JJ, *et al.* Detection of *Borrelia burgdorferi* DNA by polymerase chain reaction in cerebrospinal  
80 fluid in Lyme neuroborreliosis. *The Journal of infectious diseases* 1996; 174: 623-627.
- 81 31. Nowakowski J, *et al.* Blood cultures for patients with extracutaneous manifestations of Lyme disease  
82 in the United States. *Clinical infectious diseases : an official publication of the Infectious Diseases Society*  
83 *of America* 2009; 49: 1733-1735; doi:10.1086/648076 [doi].
- 84 32. Pavia CS, *et al.* An indirect hemagglutination antibody test to detect antibodies to *Borrelia*  
85 *burgdorferi* in patients with Lyme disease. *Journal of microbiological methods* 2000; 40: 163-173;  
86 doi:S0167-7012(00)00119-6 [pii].
- 87 33. Phillips SE, *et al.* A proposal for the reliable culture of *Borrelia burgdorferi* from patients with chronic  
88 Lyme disease, even from those previously aggressively treated. *Infection* 1998; 26: 364-367.
- 89 34. Porwancher RB, *et al.* Multiplex immunoassay for Lyme disease using VlsE1-IgG and pepC10-IgM  
90 antibodies: improving test performance through bioinformatics. *Clinical and vaccine immunology : CVI*  
91 2011; 18: 851-859; doi:10.1128/CVI.00409-10 [doi].
- 92 35. Qiu B, *et al.* Selection of continuous epitope sequences and their incorporation into poly(ethylene  
93 glycol)-peptide conjugates for use in serodiagnostic immunoassays: application to Lyme disease.  
94 *Biopolymers* 2000; 55: 319-333; doi:10.1002/1097-0282(2000)55:4<319::AID-BIP1005>3.0.CO;2-W [pii].
- 95 36. Sapi E, *et al.* Improved culture conditions for the growth and detection of *Borrelia* from human  
96 serum. *International journal of medical sciences* 2013; 10: 362-376; doi:10.7150/ijms.5698 [doi].
- 97 37. Sikand VK, Rothel JS, Martin RM. Diagnosis of Lyme borreliosis by a whole-blood gamma interferon  
98 assay for cell-mediated immune responses. *Clinical and diagnostic laboratory immunology* 1999; 6: 445.
- 99 38. Sivak SL, *et al.* Accuracy of IgM immunoblotting to confirm the clinical diagnosis of early Lyme  
100 disease. *Archives of Internal Medicine* 1996; 156: 2105-2109.

- 101 39. Steere AC, *et al.* Prospective study of serologic tests for Lyme disease. *Clinical infectious diseases : an*  
102 *official publication of the Infectious Diseases Society of America* 2008; 47: 188-195; doi:10.1086/589242  
103 [doi].
- 104 40. Tilton RC, Sand MN, Manak M. The western immunoblot for Lyme disease: determination of  
105 sensitivity, specificity, and interpretive criteria with use of commercially available performance panels.  
106 *Clinical infectious diseases : an official publication of the Infectious Diseases Society of America* 1997; 25  
107 Suppl 1: S31-4.
- 108 41. Trevejo RT, *et al.* Evaluation of two-test serodiagnostic method for early Lyme disease in clinical  
109 practice. *The Journal of infectious diseases* 1999; 179: 931-938; doi:JID980677 [pii].
- 110 42. Wieneke CA, *et al.* Evaluation of whole-cell and OspC enzyme-linked immunosorbent assays for  
111 discrimination of early Lyme borreliosis from OspA vaccination. *Journal of clinical microbiology* 2000; 38:  
112 313-317.
- 113 43. Wormser GP, *et al.* Comparison of the yields of blood cultures using serum or plasma from patients  
114 with early Lyme disease. *Journal of clinical microbiology* 2000; 38: 1648-1650.
- 115 44. Wormser GP, *et al.* Effect of *Borrelia burgdorferi* genotype on the sensitivity of C6 and 2-tier testing  
116 in North American patients with culture-confirmed Lyme disease. *Clinical infectious diseases : an official*  
117 *publication of the Infectious Diseases Society of America* 2008; 47: 910-914; doi:10.1086/591529 [doi].
- 118 45. Wormser GP, *et al.* Improving the yield of blood cultures for patients with early Lyme disease.  
119 *Journal of clinical microbiology* 1998; 36: 296-298.
- 120 46. Wormser GP, *et al.* Single-tier testing with the C6 peptide ELISA kit compared with two-tier testing  
121 for Lyme disease. *Diagnostic microbiology and infectious disease* 2013; 75: 9-15;  
122 doi:10.1016/j.diagmicrobio.2012.09.003 [doi].
- 123 47. Yu Z, *et al.* Presentation of peptide antigens as albumin conjugates for use in detection of serum  
124 antibodies by enzyme-linked immunosorbent assay. *Bioconjugate chemistry* 1996; 7: 338-342;  
125 doi:10.1021/bc960018s [doi].
- 126 48. Yu Z, *et al.* Multi-well ELISA based on independent peptide antigens for antibody capture.  
127 Application to Lyme disease serodiagnosis. *Journal of immunological methods* 1996; 198: 25-33;  
128 doi:0022175996001408 [pii].

129

130

131

132 **List of licensed tests for Lyme disease as of May 2015**

| Name in Tables                                    | Test Name                                                    | Company                         | Description/ Target                                                                                                                                        | SR Table   | FDA approved | HCMDA approved |
|---------------------------------------------------|--------------------------------------------------------------|---------------------------------|------------------------------------------------------------------------------------------------------------------------------------------------------------|------------|--------------|----------------|
| <b>EIA</b>                                        |                                                              |                                 |                                                                                                                                                            |            |              |                |
|                                                   | 3M IGG Fastlyme(TM) Test                                     | 3M Company                      |                                                                                                                                                            |            | yes          |                |
|                                                   | Bartels lyme disease IgM EIA                                 | Baxter Diagnostics Inc.         |                                                                                                                                                            |            | yes          |                |
| Vidas                                             | Vidas Lyme Screen II (IgM and IgG)                           | Biomerieux Vitek Inc.           | Whole cell sonicate, objective reading.                                                                                                                    | T2, T3, T5 | yes          | yes            |
| BION Borrelia Burgdorferi Antigen Substrate Slide | BION Borrelia Burgdorferi Antigen Substrate Slide            | MBL international               | Whole-cell sonicated B. burgdorferi B31. Semi-quantitative.                                                                                                | T6         | yes          |                |
|                                                   | Platelia® Lyme IgM /IgG                                      | Bio-Rad Laboratories            | Whole-cell sonicated B. burgdorferi B31 IgG and IgM. Objective reading.                                                                                    |            | yes          |                |
|                                                   | Boston Biomedica Inc. Borrelia burgdorferi IgM/ IgG          | Boston Biomedica Inc.           |                                                                                                                                                            |            | yes          |                |
| Cambridge                                         | Human Lyme EIA for the detect of antibodies                  | Cambridge Bioscience Corp.      | Whole-cell sonicated B. burgdorferi B31 IgG and IgM. Objective reading.                                                                                    | T2, T6     | removed      |                |
|                                                   | Prevue™ <i>Borrelia burgdorferi</i> antibody detection assay | Chembio Diagnostic Systems Inc. | Prevue™ <i>Borrelia burgdorferi</i> antibody detection assay uses recombinant antigens: OspA, OspB, OspC (3 types), p 93 and flagellin. Objective reading. |            | yes          |                |
|                                                   | IS <i>Borrelia burgdorferi</i> IgG/ IgM ELISA test system    | Columbia Bioscience Inc.        |                                                                                                                                                            |            | yes          |                |
|                                                   | Lyme IgG/IgM ELISA                                           | Diagnostic Automation           | Whole-cell sonicated B. burgdorferi B31 IgG and IgM. Objective reading.                                                                                    |            |              | yes            |
|                                                   | Lyme-check™ test kit                                         | Diagnostic Technology Inc.      |                                                                                                                                                            |            | yes          |                |
|                                                   | Lyme Disease microassay (IgM/IgG)                            | Diamedix corp.                  |                                                                                                                                                            |            | yes          |                |
| Liason                                            | Liason Borrelia IgG /IgM assay model 310870 (CLIA)           | Diasorin                        | chemiluminescence assay, quantitative determination IgG=VlsE target, IgM= two recombinant antigens OspC and                                                | T2, T3, T6 |              | yes            |

|                                   |                        |                                                                                                                                                                                                                                  |     |
|-----------------------------------|------------------------|----------------------------------------------------------------------------------------------------------------------------------------------------------------------------------------------------------------------------------|-----|
| Anti-B. burgdorferi VlsE IgG      | Euroimmun              | VlsE. Objective reading<br>Antigens: extract of Borrelia burgdorferi sensu stricto, Borrelia garinii and Borrelia afzelii (whole antigen) / recombinant VlsE from Borrelia burgdorferi sensu stricto (IgG).<br>Objective reading | yes |
| Anti-Borrelia VlsE IgG            | Euroimmun              | Antigens: extract of Borrelia burgdorferi sensu stricto, Borrelia garinii and Borrelia afzelii (whole antigen) / recombinant VlsE from Borrelia burgdorferi sensu stricto (IgG).<br>Objective reading                            | yes |
| Lyme Screen IgG/IgM               | Euroimmun              | Recombinant VlsE from Borrelia burgdorferi sensu stricto and Borrelia OspC.<br>Semiquantitative. Objective reading                                                                                                               | yes |
| CSF - Anti-Borrelia VlsE IgM/ IgG | Euroimmun              | Whole antigen, SDS extract of Borrelia burgdorferi sensu stricto, B. garinii and B. afzelii plus recombinant VlsE of B. burgdorferi sensu stricto.                                                                               | yes |
| Anti-Borrelia Select IgM/ IgG     | Euroimmun              | Highly specific recombinant antigens from different human pathogenic Borrelia strains are used as the antigen. The test includes VlsE. Objective Reading.                                                                        | yes |
| Lyme IgM ELISA test               | Gull laboratories Inc. | Whole cell sonicate B. burgdorferi (JD1 strain)                                                                                                                                                                                  | yes |
| Lyme Disease ELISA (IgG)          | Hillcrest Biologicals  |                                                                                                                                                                                                                                  | yes |
| Lyme disease IFA (IgG/ IgM)       | Hillcrest Biologicals  |                                                                                                                                                                                                                                  | yes |
| Borrelia + VlsE IgG               | IBL International      | Sandwich ELISA IgG= mixed antigens for B. burgdorferi, B. garinii and B. afzelii combined                                                                                                                                        | yes |

|                                              |                                                           |                                      |                                                                                                                                                  |            |     |     |
|----------------------------------------------|-----------------------------------------------------------|--------------------------------------|--------------------------------------------------------------------------------------------------------------------------------------------------|------------|-----|-----|
|                                              |                                                           |                                      | with a recombinant VlsE antigen.                                                                                                                 |            |     |     |
|                                              | Borrelia 14kDa & OspC IgM                                 | IBL International                    | Sandwich ELISA IgM= recombinant 14kDa and native OspC (from B. afzelii).                                                                         |            |     | Yes |
| Immunetics C6                                | Immunetics® C6 <i>B. burgdorferi</i> ELISA™ kit           | Immunetics®                          | Recombinant protein. Objective reading.                                                                                                          | T2, T3, T6 | yes | yes |
|                                              | Quanta Lite® Lyme <i>B. burgdorferi</i> IgG/IgM ELISA kit | Inova diagnostics Inc.               |                                                                                                                                                  |            | yes |     |
| MarDx Lyme disease EIA (IgM/IgG) test system | MARDX Lyme disease EIA (IgG & IgM) test system            | MARDX diagnostics Inc.               | Whole cell sonicate B. burgdorferi (Strain B 31), objective reading                                                                              | T3, T6     | yes | yes |
|                                              | MARDX Lyme disease IgG/IgM IFA test system                | MARDX diagnostics Inc.               | Whole cell sonicate B. burgdorferi (strain B31). objective reading                                                                               |            | yes |     |
|                                              | <i>Borrelia burgdorferi</i> IgM antibody test system      | Medical Diagnostic Technologies Inc. |                                                                                                                                                  |            | yes |     |
|                                              | <i>Borrelia burgdorferi</i> polyval IgG/IgM antibody test | Medical diagnostic technologies Inc. |                                                                                                                                                  |            | yes |     |
|                                              | RecomWell Borrelia IgM/ IgG                               | Mikrogen                             | Immunodominant antigens of B. burgdorferi sensu stricto, B. garinii and B. afzelii. IgM: OspC, p41/internal, VlsE and IgG: p100, OspC, VlsE, p18 |            |     | yes |
|                                              | Classic B. burgdorferi IgG/ IgM                           | Serion                               | Qualitative and quantitative immunoassays. Mixture of native antigens from B. afzelii and B. garinii and recombinant VlsE.                       |            |     | yes |
|                                              | <i>Borrelia burgdorferi</i> IgG/ IgM ELISA test system    | Trinity Biotech USA                  | Whole cell sonicate of B. burgdorferi (strain B31)                                                                                               |            | yes |     |
|                                              | Lyme-Spot IF kit                                          | Vitek systems Inc.                   |                                                                                                                                                  |            | yes |     |
| Wampole                                      | <i>Borrelia burgdorferi</i> IgG/IgM ELISA test system     | Wampole laboratories                 | Whole cell sonicate. Objective reading.                                                                                                          | T2, T3, T5 | yes |     |
|                                              | FIAX test kit for Lyme Disease antibodies (IgG/IgM)       | Whittaker Bioproducts Inc.           |                                                                                                                                                  |            | yes |     |
| Lyme STAT test                               | Lyme STAT M or G test kit (IgG/IgM)                       | Whittaker Bioproducts Inc.           | Whole cell sonicate. Subjective                                                                                                                  | T3, T6     | yes |     |

|                                                    |                                                                              |                                                    |                                                                                                                                                                                                         |        |     |     |
|----------------------------------------------------|------------------------------------------------------------------------------|----------------------------------------------------|---------------------------------------------------------------------------------------------------------------------------------------------------------------------------------------------------------|--------|-----|-----|
| kit                                                |                                                                              |                                                    | reading.                                                                                                                                                                                                |        |     |     |
| Zeus AtheNA                                        | Athena multi-lyte borrelia VlsE-1/PEPC10 plus test system                    | Zeus Scientific Inc.                               | VlsE-1/ PEPC10- recombinant multiplex IgG. Objective reading                                                                                                                                            | T2     | yes |     |
|                                                    | IFA test for antibodies to <i>Borrelia burgdorferi</i>                       | Zeus Scientific Inc.                               | Semi-quantitative. Whole cell sonicate, <i>B. burgdorferi</i> (B31 Strain).                                                                                                                             |        | yes | Yes |
| Zeus ELISA                                         | Lyme ELISA test system (IgG/IgM)                                             | Zeus Scientific Inc.                               | Whole cell sonicate, <i>B. burgdorferi</i> (B31 Strain). Objective Reading.                                                                                                                             | T2     | yes | yes |
|                                                    | Zeus ELISA Borrelia VlsE-1/PEPC10 IgG/IgM test system                        | Zeus Scientific Inc.                               | Inactivated VlsE-1 and pepC10 antigens. Objective reading                                                                                                                                               |        | yes | yes |
| <b>Westernblot</b>                                 |                                                                              |                                                    |                                                                                                                                                                                                         |        |     |     |
| BBI Bb IgM or IgG Western Blot Test Kit            | BBI-Biotech research laboratories <i>B. burgdorferi</i> IgM Western blot kit | Boston Biomedica Inc.                              | Purified antigen. Subjective reading                                                                                                                                                                    | T4, T6 | yes |     |
| Cambridge Biotech Human Lyme IgG /IgM Western Blot | Cambridge Biotech Human Lyme IgG / IgM western blot (90111/ 90112)           | Cambridge Biotech Corp. / Calypte Biomedical Corp. |                                                                                                                                                                                                         | T6     | yes |     |
|                                                    | Human Lyme IgM/IgG western blot kit                                          | Cambridge Diagnostics Ireland Ltd.                 |                                                                                                                                                                                                         |        | yes |     |
|                                                    | Anti- <i>B. burgdorferi</i> US EuroLine IgG /IgM                             | Euroimmun                                          | Whole antigen, SDS extract of <i>B. burgdorferi sensu stricto</i>                                                                                                                                       |        |     | Yes |
|                                                    | Anti- <i>B. afzelii</i> IgG                                                  | Euroimmun                                          | Whole antigen, SDS extract of <i>B. afzelii</i>                                                                                                                                                         |        |     | Yes |
|                                                    | Anti- <i>B. garinii</i> IgG                                                  | Euroimmun                                          | Whole antigen, SDS extract of or <i>B. garinii</i>                                                                                                                                                      |        |     | yes |
| ImmunoDOT Borrelia Dot Blot IgG/IgM Test (GenBio)  | ImmunoDOT Borrelia dot blot G or M test                                      | GenBio                                             | whole <i>B. burgdorferi</i> antigens and four specific proteins: a high molecular weight protein (HMW), flagellin, a 39 kD protein (p39/ BmpA), and outer surface protein C (OspC). Subjective reading. | T4, T6 | yes |     |
| Immunowell Borrelia (Lyme) test                    | Immunowell <i>Borrelia</i> (Lyme) test                                       | GenBio                                             | Whole cell <i>B. burgdorferi</i>                                                                                                                                                                        | T6     | yes |     |

|                                                                     |                                                                                        |                           |                                                                                                                                                                                                                                                                                                                         |                |     |     |
|---------------------------------------------------------------------|----------------------------------------------------------------------------------------|---------------------------|-------------------------------------------------------------------------------------------------------------------------------------------------------------------------------------------------------------------------------------------------------------------------------------------------------------------------|----------------|-----|-----|
|                                                                     | <i>Borrelia burgdorferi</i> B31 IgM/IgG line blot test                                 | Gold Standard diagnostics | Target proteins<br>IgG=p83/93/100 (Late LD)<br>Oms66 (p66), OppA-2 (p58),<br>Heat Shock (p45), Flagellin<br>(p41), BmpA (p39). OspA (p31),<br>(p30, p28, p18), OspC (p23).<br>IgM= flagellin (p41), and OspC<br>(p23). Objective reading.                                                                               |                | yes |     |
|                                                                     | Qualicode <i>B. burgdorferi</i> gG/IgM western blot kit models DK-C052-024/DK-C062-024 | Immunitics®               |                                                                                                                                                                                                                                                                                                                         |                | yes |     |
| Marblot                                                             | Mardx Lyme Disease (IgM/IgG) Marblot strip test system                                 | Mardx Diagnostics Inc.    | Purified antigens/ Subjective reading.                                                                                                                                                                                                                                                                                  | T2, T4, T5, T6 | yes | yes |
|                                                                     | RecomLine <i>Borrelia</i> IgM/ IgG                                                     | Mikrogen                  | Detects antibodies to <i>B. burgdorferi</i> , <i>B. garinii</i> , <i>B. afzelii</i> , <i>B. spielmanii</i> and <i>B. bavariensis</i> targeting VlsE, OspC and p18 (DbpA), p58 ( <i>B. garinii</i> ), p39 ( <i>B. afzelii</i> ), OspA ( <i>B. afzelii</i> ), p100 ( <i>B. afzelii</i> ), p41 ( <i>B. burgdorferi</i> ss) |                |     | yes |
| MRL diagnostics:<br>Lyme Disease<br>Bb genogroup 1<br>WB IgG or IgM | Lyme disease <i>B. burgdorferi</i> genotype 1 western blot IgG/IgM (WB0400G/WB0400M)   | MRL Diagnostics           |                                                                                                                                                                                                                                                                                                                         | T5             | yes |     |
| Virablots                                                           | Viramed biotech <i>Borrelia</i> B31 IgM/IgG Virablots                                  | Viramed Biotech Ag        | Purified antigen/ Subjective reading.                                                                                                                                                                                                                                                                                   | T2, T4         | yes |     |
|                                                                     | Viramed Biotech AG <i>Borrelia</i> B31 IgG /IgM Virastripe® Model V-BBSGUS             | Viramed Biotech Ag        | Native, purified antigens <i>B. burgdorferi</i> (strain B31), Subjective reading.                                                                                                                                                                                                                                       |                | yes |     |
|                                                                     | <i>Borrelia burgdorferi</i> IgG or IgM western blot test system                        | Zeus Scientific Inc.      |                                                                                                                                                                                                                                                                                                                         |                | yes |     |
| <b>PCR</b>                                                          |                                                                                        |                           |                                                                                                                                                                                                                                                                                                                         |                |     |     |
|                                                                     | <i>Borrelia</i> Burgdorferi Primer Pair                                                | Focus Diagnostics         |                                                                                                                                                                                                                                                                                                                         |                |     |     |
